# Supplementary material
Source: PubMed Central journal article supplement (PMC8440396)

4a

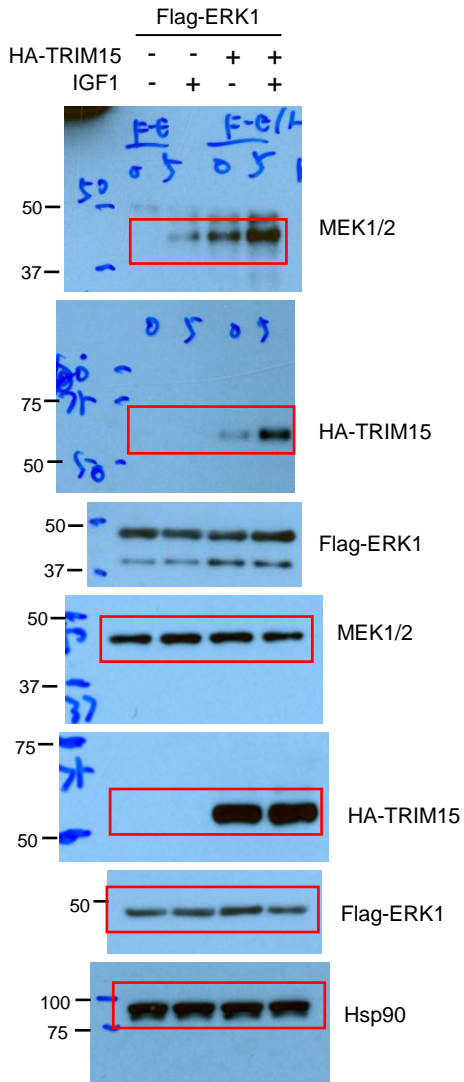

4b

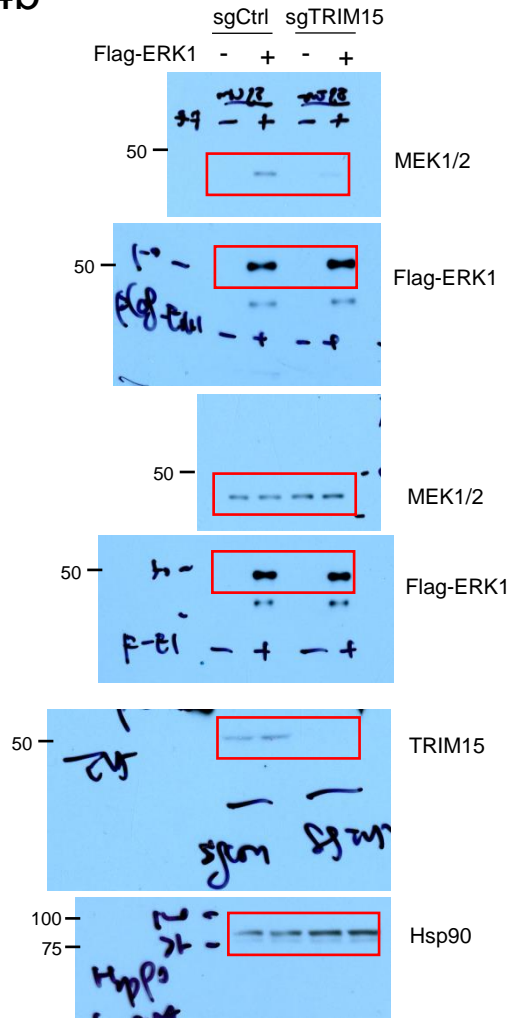

4c

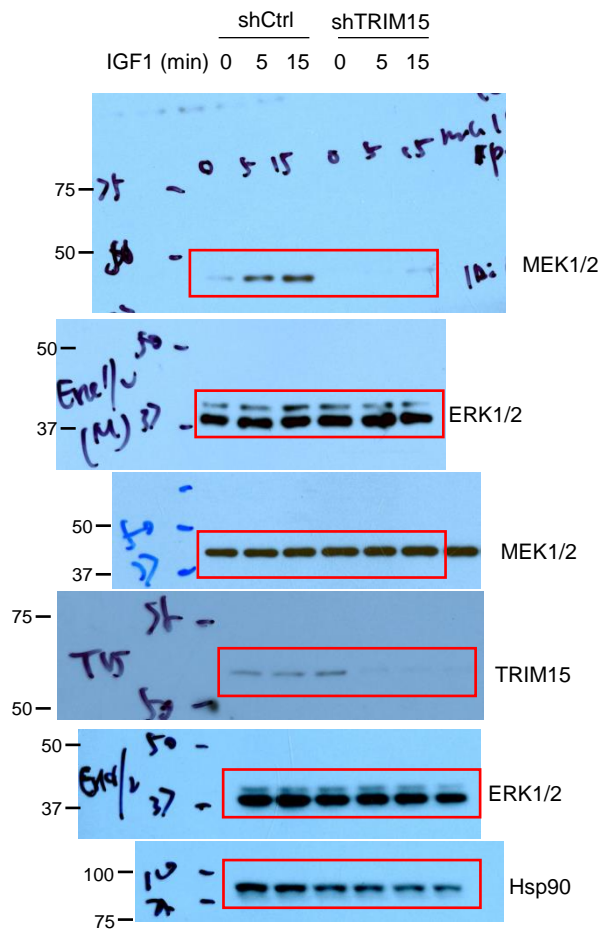

4d

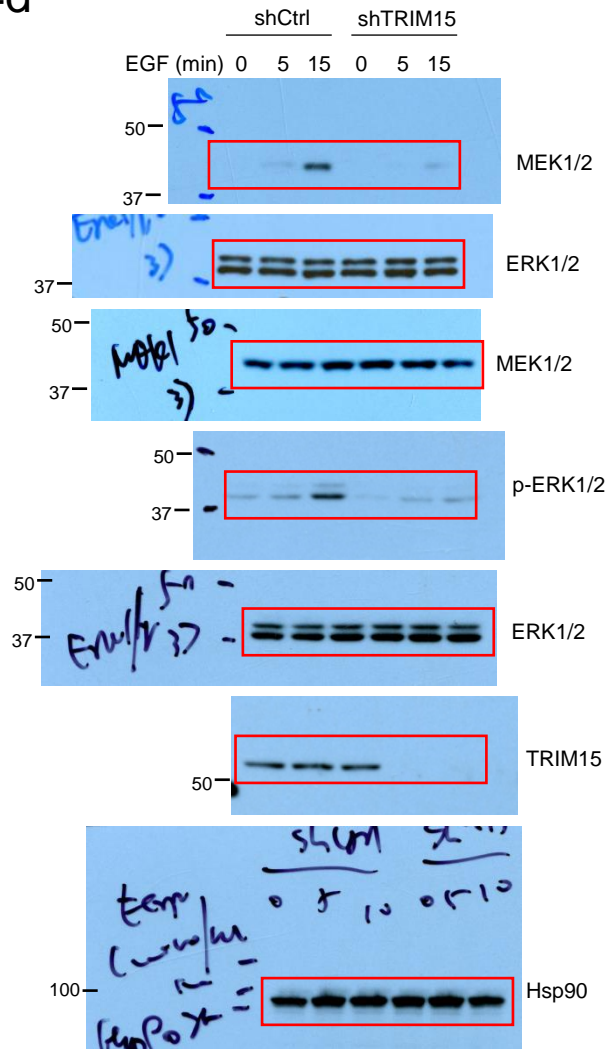

4e

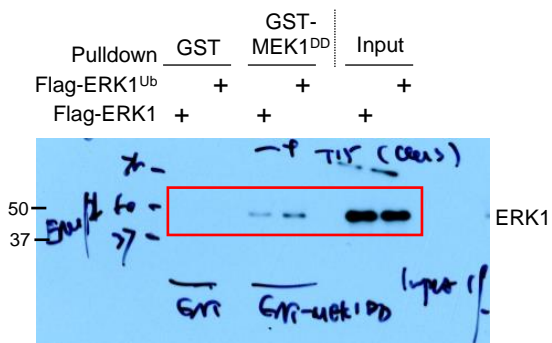

4f

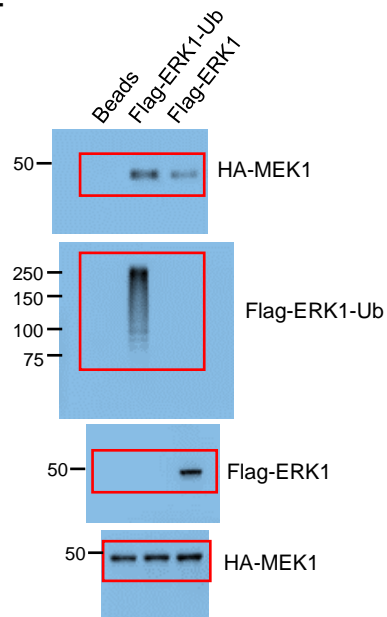

4g

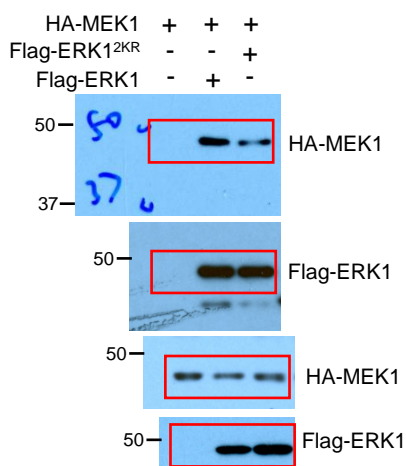

4h

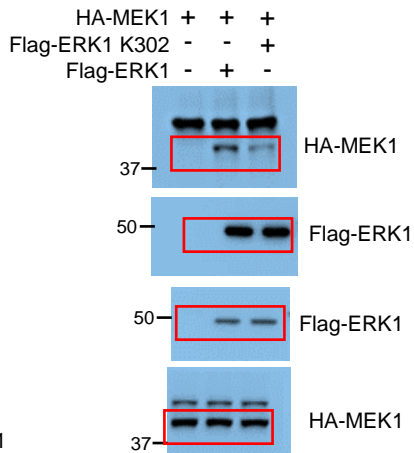

4i

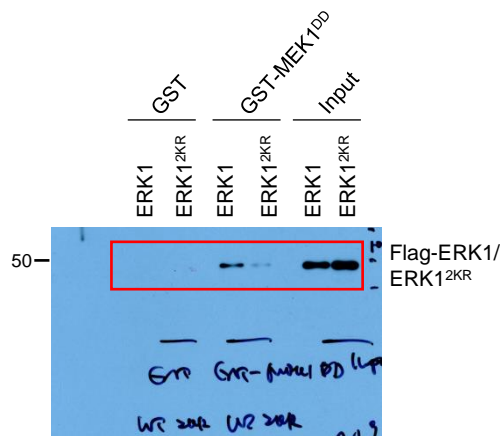

4j

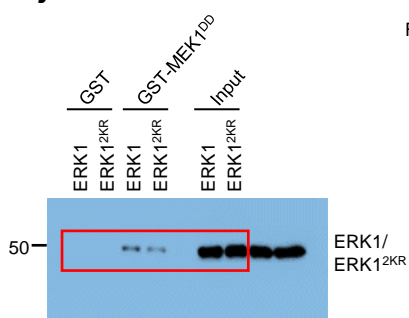

4k

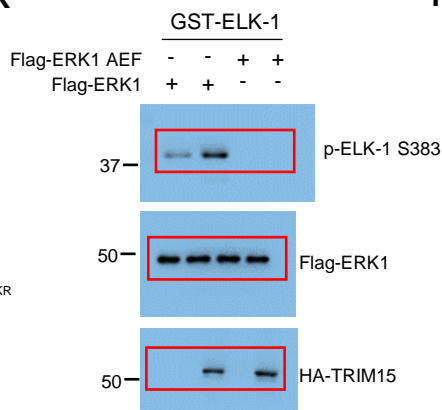

4l

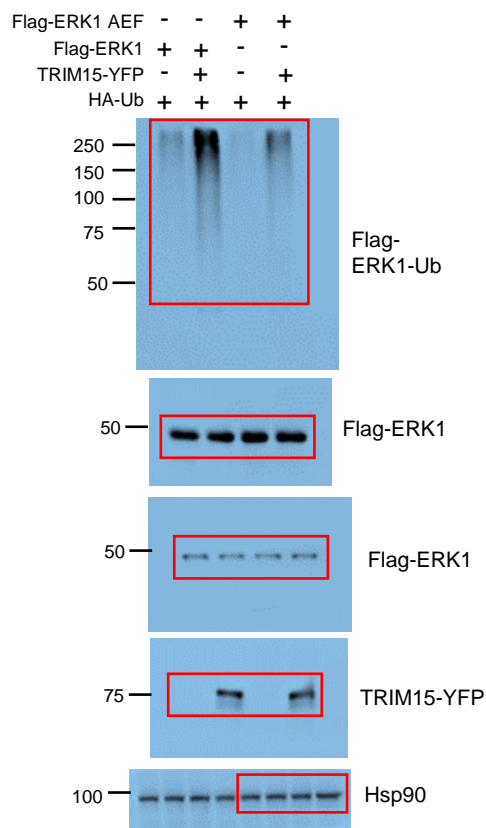

Supplement: NIHMS1722171-supplement-Unprocessed_Gels_or_Blots_for_Fig__4.pdf [file NIHMS1722171-supplement-Unprocessed_Gels_or_Blots_for_Fig__4.pdf]
